# Supplementary material for: Short-Term ONX-0914 Administration: Performance and Muscle Phenotype in Mdx Mice
Source: MDPI journal article supplement (doi:10.3390/ijerph17145211), 2020-07-19
Supplement: s1 [file s1]

Short-term **ONX-0914 Administration**: Performance and muscle phenotype  
in *Mdx* mice

Dongmin. Kwak<sup>1</sup>, Guoxian. Wei<sup>1</sup>, LaDora V. Thompson<sup>1\*</sup>, Jong-Hee Kim<sup>2\*</sup>

<sup>1</sup>Department of Physical Therapy and Athletic Training, Boston University, Boston, MA.

<sup>2</sup>Department of Physical Education, Hanyang University, Seoul, South Korea.

\*Equal contribution and corresponding authors

Correspondence:

<sup>1</sup> LaDora V. Thompson

Boston University

College of Health & Rehabilitation Sciences: Sargent College

Department of Physical Therapy & Athletic Training

635 Commonwealth Ave., Boston, MA 02215

<sup>2</sup> Jong-Hee Kim

Hanyang University

College of Performing Arts and Sport

Department of Physical Education

222 Wangsimni-ro, Seongdong-gu, Seoul 04763

## ONLINE SUPPLEMENTARY MATERIAL

### Supplemental Figure 1.

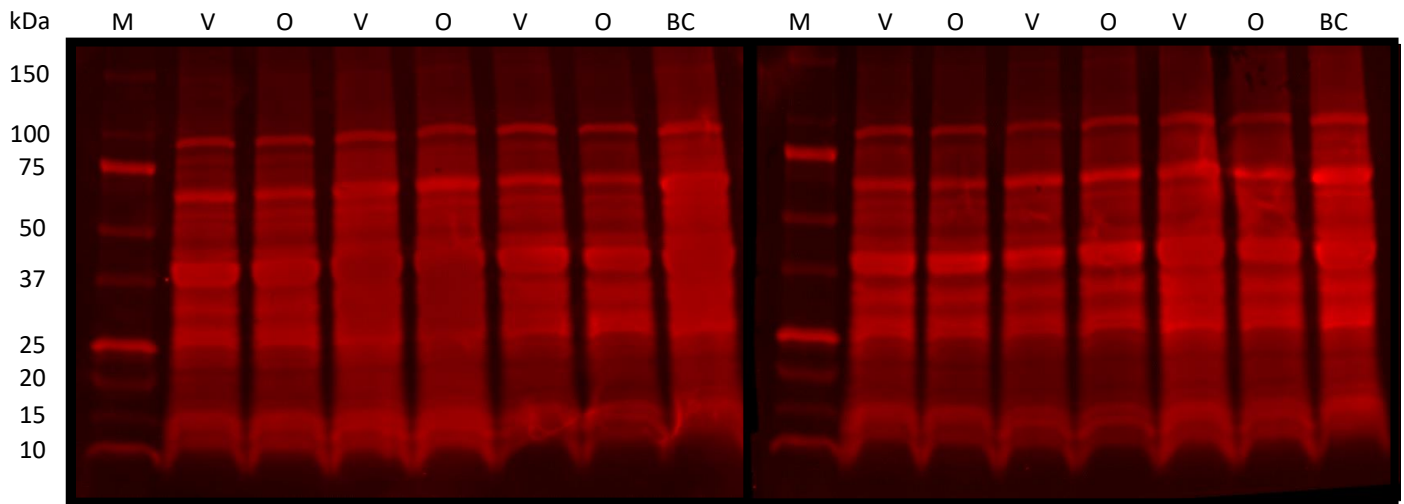

**Representative image of total proteins from the gastrocnemius muscles (enriched proteasome preparation).** The blot was stained with REVERT™ Total Protein Stain (licor.com/revert) by following REVERT™ Total Protein Stain Normalization Protocol, <https://www.licor.com/documents/1q6nvqiov23om7n80hxo046w9mpfqx3s>. The stained blots were imaged at 700 nm channel (red) with Odyssey imaging system (Li-Cor Biosciences, Lincoln, NE). M: Standard protein markers (kDa), BC: blot control (20 µg from one gastrocnemius in WT-V group), ONX-0914 treated MDX mouse (O) and vehicle treated MDX mouse (V).

**Supplemental Figure 2.**

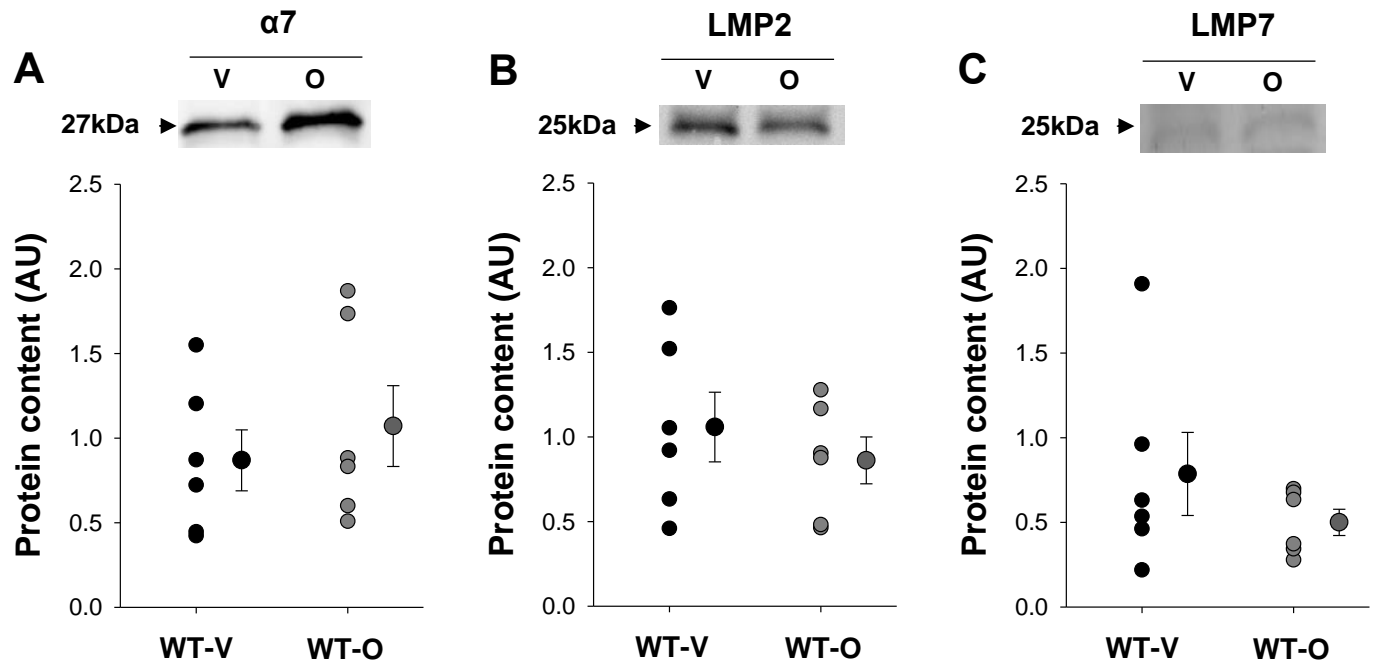

**The content of  $\alpha 7$ , LMP2, and LMP7 in WT-V and WT-O mice.** The content of  $\alpha 7$ (A), LMP2 (B), and LMP7 (C) of the gastrocnemius muscle in WT-V and WT-O mice was determined using Western blot analysis. Proteins were normalized to total protein and expressed as arbitrary unit (AU). Data presented as individual points (each mouse) with mean and standard error of the means (S.E.M.) \* indicates  $p < 0.05$  comparing Vehicle to ONX-0914 treatment groups. Sample size:  $n = 6$  in each group.
